# Supplementary material
Source: PubMed Central journal article supplement (PMC9707613)
Supplement: NIHMS1697581-supplement-Tables.pdf [file NIHMS1697581-supplement-Tables.pdf]

Online Supplemental Materials for *New Parental Positivity: The Role of Positive Emotions in Promoting Relational Adjustment During the Transition to Parenthood*

Don, Eller, Simpson, Fredrickson, Algoe, Rholes & Mickelson

Re-submitted April 14<sup>th</sup>, 2021

**Ancillary Table 1**

*Dyadic analyses examining the prospective association between positive emotions and relational outcomes while controlling for negative affect in Study 1*

| <i>Outcome</i>            | <i>Predictor</i>                          | <i>B</i>    | <i>p</i>    | <i>Lower</i> | <i>Upper</i> |
|---------------------------|-------------------------------------------|-------------|-------------|--------------|--------------|
| Relationship Satisfaction | Paternal Slope                            | -0.24       | <.001       | -0.31        | -0.16        |
|                           | Maternal Slope                            | -0.22       | <.001       | -0.29        | -0.14        |
|                           | Paternal Lagged Negative Affect           | -0.05       | .73         | -0.37        | 0.26         |
|                           | Maternal Lagged Negative Affect           | -0.13       | .22         | -0.33        | 0.07         |
|                           | Paternal Lagged Relationship Satisfaction | 0.00        | .92         | -0.10        | 0.09         |
|                           | Maternal Lagged Relationship Satisfaction | 0.01        | .81         | -0.09        | 0.11         |
|                           | <b>Paternal Lagged Actor PE</b>           | <b>0.16</b> | <b>.003</b> | <b>0.06</b>  | <b>0.27</b>  |
|                           | Maternal Lagged Actor PE                  | 0.01        | .82         | -0.09        | 0.12         |
|                           | Paternal Lagged Partner PE                | -           | -           | -            | -            |
|                           | Maternal Lagged Partner PE                | -           | -           | -            | -            |
| <i>Outcome</i>            | <i>Predictor</i>                          | <i>B</i>    | <i>p</i>    | <i>Lower</i> | <i>Upper</i> |
| Perceptions of PS         | Paternal Slope                            | -0.07       | .07         | -0.15        | 0.01         |
|                           | Maternal Slope                            | -0.04       | .31         | -0.10        | 0.03         |
|                           | Paternal Lagged Negative Affect           | 0.07        | 0.56        | -0.16        | 0.30         |
|                           | Maternal Lagged Negative Affect           | -0.11       | 0.14        | -0.26        | 0.04         |
|                           | Paternal Lagged Perceptions of PS         | 0.48        | 0           | 0.35         | 0.61         |
|                           | Maternal Lagged Perceptions of PS         | 0.67        | 0           | 0.56         | 0.78         |
|                           | <b>Paternal Lagged Actor PE</b>           | <b>0.10</b> | <b>.02</b>  | <b>0.02</b>  | <b>0.19</b>  |
|                           | Maternal Lagged Actor PE                  | -0.03       | .51         | -0.10        | 0.05         |
|                           | Paternal Lagged Partner PE                | -           | -           | -            | -            |
|                           | Maternal Lagged Partner PE                | -           | -           | -            | -            |
| <i>Outcome</i>            | <i>Predictor</i>                          | <i>B</i>    | <i>p</i>    | <i>Lower</i> | <i>Upper</i> |
| Perceptions of NS         | Paternal Slope                            | 0.18        | <.001       | 0.09         | 0.26         |
|                           | Maternal Slope                            | 0.04        | .39         | -0.05        | 0.13         |
|                           | Paternal Lagged Negative Affect           | 0.18        | .17         | -0.08        | 0.44         |
|                           | Maternal Lagged Negative Affect           | 0.23        | .02         | 0.04         | 0.43         |
|                           | Paternal Lagged Perceptions of NS         | 0.39        | <.001       | 0.25         | 0.53         |
|                           | Maternal Lagged Perceptions of NS         | 0.50        | <.001       | 0.35         | 0.66         |
|                           | Paternal Lagged Actor PE                  | -0.08       | .10         | -0.17        | 0.01         |
|                           | Maternal Lagged Actor PE                  | 0.02        | .68         | -0.08        | 0.12         |
|                           | Paternal Lagged Partner PE                | -0.06       | .12         | -0.14        | 0.02         |
|                           | Maternal Lagged Partner PE                | -0.03       | .56         | -0.12        | 0.06         |

*Note.* To save space, intercepts have been omitted from these tables. Statistically significant, focal effects are highlighted in bold.

**Ancillary Table 2**

*Dyadic Analyses Examining the Prospective Association between Positive Emotions and Relationship Satisfaction while Controlling for Stress or Parenting Self-Efficacy in Study 1*

| Outcome                   | Predictor                        | <i>B</i>    | <i>p</i>        | 95% CI       |              |
|---------------------------|----------------------------------|-------------|-----------------|--------------|--------------|
|                           |                                  |             |                 | <i>Lower</i> | <i>Upper</i> |
| Relationship Satisfaction | Paternal Intercept               | 5.09        | <.001           | 4.77         | 5.40         |
|                           | Maternal Intercept               | 4.97        | <.001           | 4.67         | 5.26         |
|                           | Paternal Slope                   | -0.16       | .002            | -0.26        | -0.06        |
|                           | Maternal Slope                   | -0.10       | .05             | -0.20        | 0.00         |
|                           | Paternal Lagged RS               | 0.47        | <.001           | 0.34         | 0.61         |
|                           | Maternal Lagged RS               | 0.56        | <.001           | 0.41         | 0.70         |
|                           | <b>Paternal Lagged Actor PE</b>  | <b>0.16</b> | <b>.001</b>     | <b>0.07</b>  | <b>0.25</b>  |
|                           | Maternal Lagged Actor PE         | 0.06        | .15             | -0.02        | 0.14         |
|                           | Paternal Lagged Daily Stress     | -0.06       | .40             | -0.19        | 0.08         |
|                           | Maternal Lagged Daily Stress     | -0.05       | .36             | -0.14        | 0.05         |
| Outcome                   | Predictor                        | <i>s</i>    | <i>p</i>        | <i>Lower</i> | <i>Upper</i> |
| Relationship Satisfaction | Paternal Intercept               | 5.16        | <.001           | 4.87         | 5.44         |
|                           | Maternal Intercept               | 5.02        | <.001           | 4.73         | 5.31         |
|                           | Paternal Slope                   | -0.17       | <.001           | -0.27        | -0.08        |
|                           | Maternal Slope                   | -0.13       | .01             | -0.22        | -0.03        |
|                           | Paternal Lagged RS               | 0.48        | <.001           | 0.35         | 0.62         |
|                           | Maternal Lagged RS               | 0.55        | <.001           | 0.41         | 0.69         |
|                           | <b>Paternal Lagged Actor PE</b>  | <b>0.17</b> | <b>&lt;.001</b> | <b>0.08</b>  | <b>0.27</b>  |
|                           | Maternal Lagged Actor PE         | 0.05        | .23             | -0.03        | 0.14         |
|                           | Paternal Parenting Self-Efficacy | -0.09       | .27             | -0.26        | 0.07         |
|                           | Maternal Parenting Self-Efficacy | 0.03        | .75             | -0.14        | 0.20         |

*Note.* RS = relationship satisfaction. PE = positive emotions.

**Ancillary Table 3***Results of Multilevel, Lagged Analysis Examining Wave as a Moderator in Study 1*

| <i>Outcome</i>            | <i>Predictor</i>                  | <i>B</i>     | <i>p</i>    | <u>95% CI</u> |              |
|---------------------------|-----------------------------------|--------------|-------------|---------------|--------------|
|                           |                                   |              |             | <i>Lower</i>  | <i>Upper</i> |
| Relationship Satisfaction | Paternal Slope                    | -0.17        | <.001       | -0.27         | -0.08        |
|                           | Maternal Slope                    | -0.13        | .009        | -0.22         | -0.03        |
|                           | Paternal Lagged RS                | 0.48         | <.001       | 0.35          | 0.61         |
|                           | Maternal Lagged RS                | 0.55         | <.001       | 0.41          | 0.70         |
|                           | <b>Paternal Lagged Actor PE</b>   | <b>0.16</b>  | <b>.001</b> | <b>0.06</b>   | <b>0.25</b>  |
|                           | Maternal Lagged Actor PE          | 0.03         | .48         | -0.06         | 0.13         |
|                           | Paternal Lagged Actor PE x Wave   | 0.003        | .95         | -0.10         | 0.10         |
|                           | Maternal Lagged Actor PE x Wave   | 0.05         | .28         | -0.04         | 0.15         |
| <i>Outcome</i>            | <i>Predictor</i>                  | <i>B</i>     | <i>p</i>    | <i>Lower</i>  | <i>Upper</i> |
| Positive Partner Support  | Paternal Slope                    | -0.07        | .09         | -0.14         | 0.01         |
|                           | Maternal Slope                    | -0.04        | .29         | -0.11         | 0.03         |
|                           | Paternal Lagged Positive Support  | 0.50         | <.001       | 0.37          | 0.62         |
|                           | Maternal Lagged Positive Support  | 0.68         | <.001       | 0.57          | 0.79         |
|                           | <b>Paternal Lagged Actor PE</b>   | <b>0.12</b>  | <b>.004</b> | <b>0.04</b>   | <b>0.20</b>  |
|                           | Maternal Lagged Actor PE          | 0.02         | .68         | -0.06         | 0.09         |
|                           | Paternal Lagged Actor PE x Wave   | -0.07        | .10         | -0.15         | 0.01         |
|                           | Maternal Lagged Actor PE x Wave   | -0.01        | .71         | -0.09         | 0.06         |
| <i>Outcome</i>            | <i>Predictor</i>                  | <i>B</i>     | <i>p</i>    | <i>Lower</i>  | <i>Upper</i> |
| Negative Support          | Paternal Slope                    | 0.18         | <.001       | 0.10          | 0.27         |
|                           | Maternal Slope                    | 0.04         | .39         | -0.05         | 0.13         |
|                           | Paternal Lagged NS                | 0.41         | <.001       | 0.27          | 0.55         |
|                           | Maternal Lagged NS                | 0.53         | <.001       | 0.38          | 0.69         |
|                           | <b>Paternal Lagged Actor PE</b>   | <b>-0.10</b> | <b>.04</b>  | <b>-0.20</b>  | <b>-0.01</b> |
|                           | Maternal Lagged Actor PE          | -0.03        | .58         | -0.13         | 0.07         |
|                           | Paternal Lagged Partner PE        | -0.04        | .36         | -0.13         | 0.05         |
|                           | Maternal Lagged Partner PE        | -0.04        | .45         | -0.14         | 0.06         |
|                           | Paternal Lagged Actor PE x Wave   | 0.003        | .94         | -0.09         | 0.10         |
|                           | Maternal Lagged Actor PE x Wave   | -0.02        | .67         | -0.13         | 0.08         |
|                           | Paternal Lagged Partner PE x Wave | -0.05        | .30         | -0.15         | 0.05         |
|                           | Maternal Lagged Partner PE x Wave | 0.00         | .96         | -0.10         | 0.11         |

*Note.* Intercepts have been omitted to save space. PE = positive emotions. RS = relationship satisfaction. PS = positive support. All three of these models include a random slope for prior levels of the outcome variable, as this was the only configuration of the model in which it would successfully converge (e.g., they would not converge with random intercepts for gender only).

**Ancillary Table 4**

*Dyadic Analyses Examining the Prospective Association between Positive Emotions and Relationship Satisfaction while Controlling for Stress or Parenting Self-Efficacy in Study 1*

| Outcome          | Predictor                        | B            | p          | 95% CI       |              |
|------------------|----------------------------------|--------------|------------|--------------|--------------|
|                  |                                  |              |            | Lower        | Upper        |
| Negative Support | Paternal Intercept               | 0.43         | .004       | 0.14         | 0.72         |
|                  | Maternal Intercept               | 0.94         | <.001      | 0.65         | 1.22         |
|                  | Paternal Slope                   | 0.16         | .001       | 0.07         | 0.25         |
|                  | Maternal Slope                   | 0.02         | .73        | -0.08        | 0.11         |
|                  | Paternal Lagged NS               | 0.40         | <.001      | 0.26         | 0.54         |
|                  | Maternal Lagged NS               | 0.54         | <.001      | 0.38         | 0.70         |
|                  | <b>Paternal Lagged Actor PE</b>  | <b>-0.10</b> | <b>.03</b> | <b>-0.18</b> | <b>-0.01</b> |
|                  | Maternal Lagged Actor PE         | -0.04        | .36        | -0.13        | 0.05         |
|                  | Paternal Lagged Partner PE       | -0.05        | .18        | -0.14        | 0.03         |
|                  | Maternal Lagged Partner PE       | -0.02        | .63        | -0.12        | 0.07         |
|                  | Paternal Lagged Daily Stress     | 0.07         | .28        | -0.06        | 0.20         |
|                  | Maternal Lagged Daily Stress     | 0.06         | .21        | -0.04        | 0.16         |
|                  | Outcome                          | Predictor    | B          | p            | Lower        |
| Negative Support | Paternal Intercept               | 0.34         | .01        | 0.08         | 0.60         |
|                  | Maternal Intercept               | 0.88         | <.001      | 0.61         | 1.15         |
|                  | Paternal Slope                   | 0.18         | <.001      | 0.10         | 0.27         |
|                  | Maternal Slope                   | 0.04         | .38        | -0.05        | 0.13         |
|                  | Paternal Lagged NS               | 0.41         | <.001      | 0.27         | 0.55         |
|                  | Maternal Lagged NS               | 0.54         | <.001      | 0.38         | 0.69         |
|                  | <b>Paternal Lagged Actor PE</b>  | <b>-0.11</b> | <b>.02</b> | <b>-0.20</b> | <b>-0.02</b> |
|                  | Maternal Lagged Actor PE         | -0.04        | .37        | -0.14        | 0.05         |
|                  | Paternal Lagged Partner PE       | -0.07        | .10        | -0.15        | 0.01         |
|                  | Maternal Lagged Partner PE       | -0.04        | .36        | -0.13        | 0.05         |
|                  | Paternal Parenting Self-Efficacy | 0.05         | .54        | -0.11        | 0.20         |
|                  | Maternal Parenting Self-Efficacy | 0.03         | .76        | -0.14        | 0.20         |

*Note.* NS = negative support. PE = positive emotions.

**Ancillary Table 5**

*Results of Multilevel Lagged Analyses using Full Information Maximum Likelihood Estimation from Study 1 Predicting Relationship Satisfaction*

| <i>Predictor</i>                    | <i>B</i>    | <i>p</i> | <u>95% CI</u> |              |
|-------------------------------------|-------------|----------|---------------|--------------|
|                                     |             |          | <i>Lower</i>  | <i>Upper</i> |
| Paternal Intercept                  | 4.10        | <.001    | 3.14          | 5.07         |
| Maternal Intercept                  | 4.43        | <.001    | 3.65          | 5.21         |
| Paternal Slope                      | -0.18       | <.001    | -0.27         | -0.09        |
| Maternal Slope                      | -0.12       | .01      | -0.22         | -0.03        |
| Paternal Lagged RS                  | 0.47        | <.001    | 0.34          | 0.60         |
| Maternal Lagged RS                  | 0.54        | <.001    | 0.40          | 0.69         |
| <b>Paternal Lagged Actor PE</b>     | <b>0.16</b> | <.001    | <b>0.08</b>   | <b>0.25</b>  |
| Maternal Lagged Actor PE            | 0.06        | .16      | -0.02         | 0.14         |
| Paternal Employment Status          | 0.44        | .26      | -0.33         | 1.21         |
| Maternal Employment Status          | 0.07        | .57      | -0.18         | 0.33         |
| Paternal Education Level            | 0.02        | .64      | -0.06         | 0.10         |
| Maternal Education Level            | -0.004      | .94      | -0.10         | 0.09         |
| Paternal Race (White vs. Non-White) | 0.16        | .20      | -0.08         | 0.40         |
| Maternal Race (White vs. Non-White) | -0.01       | .92      | -0.25         | 0.23         |
| Paternal Income                     | -0.01       | .85      | -0.06         | 0.05         |
| Maternal Income                     | -0.01       | .64      | -0.07         | 0.04         |
| Paternal Years Married              | 0.03        | .13      | -0.01         | 0.07         |
| Maternal Years Married              | 0.03        | .10      | -0.01         | 0.07         |
| Paternal Age                        | 0.01        | .24      | -0.01         | 0.03         |
| Maternal Age                        | 0.02        | .16      | -0.01         | 0.04         |

*Note.* PE = positive emotions. RS = relationship satisfaction. Parameters presented in bold indicated focal pathways that were statistically significant.

**Ancillary Table 6**

*Results of Multilevel Lagged Analyses using Full Information Maximum Likelihood Estimation from Study 1 Predicting Positive Partner Support*

| <i>Predictor</i>                    | <i>B</i> | <i>p</i> | <u>95% CI</u> |              |
|-------------------------------------|----------|----------|---------------|--------------|
|                                     |          |          | <i>Lower</i>  | <i>Upper</i> |
| Paternal Intercept                  | 2.43     | <.001    | 1.64          | 3.21         |
| Maternal Intercept                  | 2.88     | <.001    | 2.30          | 3.47         |
| Paternal Slope                      | -0.07    | .06      | -0.14         | 0.00         |
| Maternal Slope                      | -0.04    | .21      | -0.11         | 0.03         |
| Paternal Lagged PS                  | 0.49     | <.001    | 0.36          | 0.61         |
| Maternal Lagged PS                  | 0.66     | <.001    | 0.55          | 0.77         |
| <b>Paternal Lagged Actor PE</b>     | 0.10     | .007     | 0.03          | 0.17         |
| Maternal Lagged Actor PE            | 0.02     | .53      | -0.04         | 0.08         |
| Paternal Employment Status          | 0.24     | .45      | -0.39         | 0.88         |
| Maternal Employment Status          | 0.16     | .11      | -0.04         | 0.35         |
| Paternal Education Level            | 0.05     | .15      | -0.02         | 0.12         |
| Maternal Education Level            | -0.01    | .76      | -0.08         | 0.06         |
| Paternal Race (White vs. Non-White) | 0.13     | .19      | -0.07         | 0.33         |
| Maternal Race (White vs. Non-White) | 0.04     | .70      | -0.15         | 0.22         |
| Paternal Income                     | -0.03    | .18      | -0.07         | 0.01         |
| Maternal Income                     | -0.01    | .51      | -0.05         | 0.03         |
| Paternal Years Married              | 0.02     | .31      | -0.01         | 0.04         |
| Maternal Years Married              | 0.002    | .86      | -0.02         | 0.03         |
| Paternal Age                        | 0.01     | .32      | -0.01         | 0.02         |
| Maternal Age                        | 0.00     | .59      | -0.01         | 0.02         |

*Note.* PE = positive emotions. PS = positive support. Parameters presented in bold indicated focal pathways that were statistically significant.

**Ancillary Table 7**

*Results of Multilevel Lagged Analyses using Full Information Maximum Likelihood Estimation from Study 1 Predicting Perceived Partner Negative Support*

| <i>Predictor</i>                    | <i>B</i>     | <i>p</i>    | <u>95% CI</u> |               |
|-------------------------------------|--------------|-------------|---------------|---------------|
|                                     |              |             | <i>Lower</i>  | <i>Upper</i>  |
| Paternal Intercept                  | 1.32         | .003        | 0.46          | 2.17          |
| Maternal Intercept                  | 1.59         | <.001       | 0.78          | 2.40          |
| Paternal Slope                      | 0.19         | <.001       | 0.10          | 0.27          |
| Maternal Slope                      | 0.05         | .30         | -0.04         | 0.14          |
| Paternal Lagged NS                  | 0.32         | <.001       | 0.18          | 0.46          |
| Maternal Lagged NS                  | 0.53         | <.001       | 0.37          | 0.68          |
| <b>Paternal Lagged Actor PE</b>     | <b>-0.13</b> | <b>.003</b> | <b>-0.21</b>  | <b>-0.05</b>  |
| Maternal Lagged Actor PE            | -0.05        | .29         | -0.14         | 0.04          |
| <b>Paternal Lagged Partner PE</b>   | <b>-0.08</b> | <b>.05</b>  | <b>-0.16</b>  | <b>-0.001</b> |
| Maternal Lagged Partner PE          | -0.05        | .25         | -0.14         | 0.04          |
| Paternal Employment Status          | -0.50        | .15         | -1.17         | 0.18          |
| Maternal Employment Status          | 0.05         | .69         | -0.20         | 0.30          |
| Paternal Education Level            | -0.09        | .01         | -0.17         | -0.02         |
| Maternal Education Level            | -0.04        | .41         | -0.14         | 0.06          |
| Paternal Race (White vs. Non-White) | -0.33        | .005        | -0.56         | -0.10         |
| Maternal Race (White vs. Non-White) | -0.12        | .33         | -0.37         | 0.12          |
| Paternal Income                     | 0.02         | .54         | -0.03         | 0.06          |
| Maternal Income                     | -0.01        | .64         | -0.07         | 0.04          |
| Paternal Years Married              | -0.04        | .02         | -0.07         | -0.01         |
| Maternal Years Married              | -0.02        | .33         | -0.06         | 0.02          |
| Paternal Age                        | 0.01         | .41         | -0.01         | 0.02          |
| Maternal Age                        | -0.01        | .27         | -0.04         | 0.01          |

*Note.* PE = positive emotions. NS = negative support. Parameters presented in bold indicated focal pathways that were statistically significant.



**Ancillary Table 8**

*Dyadic Analyses Examining the Prospective Association Between Positive Emotions and Relational Outcomes While Controlling for Negative Affect in Study 2*

| <i>Outcome</i>            | <i>Predictor</i>                  | <i>B</i>    | <i>p</i>        | <u>95% CI</u> |              |
|---------------------------|-----------------------------------|-------------|-----------------|---------------|--------------|
|                           |                                   |             |                 | <i>Lower</i>  | <i>Upper</i> |
| Relationship Satisfaction | Paternal Slope                    | -0.21       | 0.24            | -0.58         | 0.15         |
|                           | Maternal Slope                    | -0.02       | 0.84            | -0.26         | 0.21         |
|                           | Paternal Lagged Negative Affect   | -2.93       | <.001           | -4.08         | -1.79        |
|                           | Maternal Lagged Negative Affect   | 0.21        | 0.49            | -0.41         | 0.84         |
|                           | Paternal Lagged RS                | 1.45        | <.001           | 1.36          | 1.53         |
|                           | Maternal Lagged RS                | 0.21        | <.001           | 0.16          | 0.26         |
|                           | <b>Paternal Lagged Actor PE</b>   | <b>2.01</b> | <b>&lt;.001</b> | <b>1.22</b>   | <b>2.80</b>  |
|                           | <b>Maternal Lagged Actor PE</b>   | <b>0.65</b> | <b>.02</b>      | <b>0.12</b>   | <b>1.18</b>  |
|                           | Paternal Lagged Partner PE        | -0.44       | 0.15            | -1.03         | 0.15         |
|                           | Maternal Lagged Partner PE        | 0.35        | 0.17            | -0.17         | 0.87         |
| Outcome                   | Predictor                         | B           | p               | Lower         | Upper        |
| Perceptions of PS         | Paternal Slope                    | -0.03       | .28             | -0.08         | 0.02         |
|                           | Maternal Slope                    | -0.03       | .22             | -0.07         | 0.02         |
|                           | Paternal Lagged Negative Affect   | -0.32       | .003            | -0.53         | -0.11        |
|                           | Maternal Lagged Negative Affect   | 0.01        | .88             | -0.14         | 0.17         |
|                           | Paternal Lagged Perceptions of PS | 0.61        | <.001           | 0.53          | 0.69         |
|                           | Maternal Lagged Perceptions of PS | 0.18        | <.001           | 0.10          | 0.26         |
|                           | <b>Paternal Lagged Actor PE</b>   | <b>0.37</b> | <b>&lt;.001</b> | <b>0.22</b>   | <b>0.52</b>  |
|                           | Maternal Lagged Actor PE          | 0.10        | .12             | -0.03         | 0.24         |
|                           | Paternal Lagged Partner PE        | 0.05        | .34             | -0.06         | 0.16         |
|                           | Maternal Lagged Partner PE        | -0.05       | .44             | -0.18         | 0.08         |
| Outcome                   | Predictor                         | B           | p               | Lower         | Upper        |
| Reports of SP             | Paternal Slope                    | -0.02       | .51             | -0.07         | 0.04         |
|                           | Maternal Slope                    | 0.001       | .94             | -0.03         | 0.03         |
|                           | Paternal Lagged Negative Affect   | -0.29       | .003            | -0.49         | -0.10        |
|                           | Maternal Lagged Negative Affect   | -0.03       | .56             | -0.13         | 0.07         |
|                           | Paternal Lagged Support Provision | 0.97        | <.001           | 0.88          | 1.07         |
|                           | Maternal Lagged Support Provision | 0.11        | .002            | 0.04          | 0.17         |
|                           | <b>Paternal Lagged Actor PE</b>   | <b>0.32</b> | <b>&lt;.001</b> | <b>0.19</b>   | <b>0.45</b>  |
|                           | Maternal Lagged Actor PE          | 0.07        | .12             | -0.02         | 0.15         |
|                           | Paternal Lagged Partner PE        | -0.01       | .82             | -0.11         | 0.09         |
|                           | <b>Maternal Lagged Partner PE</b> | <b>0.08</b> | <b>.04</b>      | <b>0.00</b>   | <b>0.17</b>  |

*Note.* To save space, intercepts have been omitted from these tables. Statistically significant, focal effects are highlighted in bold.

Ancillary Table 9

| Outcome                   | Predictor                        | <i>B</i>           | <i>p</i> | 95% CI       |              |
|---------------------------|----------------------------------|--------------------|----------|--------------|--------------|
|                           |                                  |                    |          | <i>Lower</i> | <i>Upper</i> |
| Relationship Satisfaction | Paternal Intercept               | 32.09              | <.001    | 28.43        | 35.74        |
|                           | Maternal Intercept               | 39.86              | <.001    | 37.66        | 42.06        |
|                           | Paternal Slope                   | -0.03              | .91      | -0.50        | 0.45         |
|                           | Maternal Slope                   | -0.08              | .55      | -0.34        | 0.18         |
|                           | Paternal Lagged RS               | 1.84               | <.001    | 1.75         | 1.92         |
|                           | Maternal Lagged RS               | 0.20               | <.001    | 0.16         | 0.25         |
|                           | <b>Paternal Lagged Actor PE</b>  | 3.06               | <.001    | 2.38         | 3.75         |
|                           | <b>Maternal Lagged Actor PE</b>  | 0.43               | .02      | 0.08         | 0.79         |
|                           | Paternal Lagged Partner PE       | -0.40              | .20      | -1.01        | 0.21         |
|                           | Maternal Lagged Partner PE       | 0.35               | .12      | -0.09        | 0.79         |
|                           | Paternal Lagged Parenting Stress | -0.38              | .27      | -1.05        | 0.30         |
|                           | Maternal Lagged Parenting Stress | 0.08               | .70      | -0.32        | 0.47         |
|                           | Relationship Satisfaction        | Paternal Intercept | 32.43    | <.001        | 28.90        |
|                           | Maternal Intercept               | 39.74              | <.001    | 37.39        | 42.09        |
|                           | Paternal Slope                   | -0.15              | .45      | -0.56        | 0.26         |
|                           | Maternal Slope                   | -0.05              | .65      | -0.29        | 0.18         |
|                           | Paternal Lagged RS               | 1.72               | <.001    | 1.63         | 1.81         |
|                           | Maternal Lagged RS               | 0.21               | <.001    | 0.16         | 0.26         |
|                           | <b>Paternal Lagged Actor PE</b>  | 3.10               | <.001    | 2.41         | 3.79         |
|                           | <b>Maternal Lagged Actor PE</b>  | 0.45               | .03      | 0.05         | 0.84         |
|                           | Paternal Lagged Partner PE       | -0.40              | .20      | -1.01        | 0.21         |
|                           | Maternal Lagged Partner PE       | 0.34               | .15      | -0.13        | 0.80         |
|                           | Paternal Lagged CS               | -0.09              | .78      | -0.68        | 0.51         |
|                           | Maternal Lagged CS               | 0.09               | .65      | -0.31        | 0.50         |

*Note.* RS = Relationship Satisfaction. CSI = Childcare Satisfaction.

**Ancillary Table 10**

*Dyadic Analyses Examining the Prospective Association between Positive Emotions and Positive Partner Support while Controlling for Parenting Stress or Childcare Satisfaction in Study 2*

| Outcome                  | Predictor                        | B     | p     | 95% CI |       |
|--------------------------|----------------------------------|-------|-------|--------|-------|
|                          |                                  |       |       | Lower  | Upper |
| Positive Partner Support | Paternal Intercept               | 3.78  | <.001 | 3.13   | 4.42  |
|                          | Maternal Intercept               | 5.91  | <.001 | 5.42   | 6.40  |
|                          | Paternal Slope                   | 0.02  | .68   | -0.06  | 0.09  |
|                          | Maternal Slope                   | -0.04 | .14   | -0.09  | 0.01  |
|                          | Paternal Lagged PS               | 1.28  | <.001 | 1.20   | 1.36  |
|                          | Maternal Lagged PS               | 0.22  | <.001 | 0.16   | 0.28  |
|                          | <b>Paternal Lagged Actor PE</b>  | 0.49  | <.001 | 0.37   | 0.62  |
|                          | Maternal Lagged Actor PE         | 0.08  | .06   | 0.00   | 0.16  |
|                          | Paternal Lagged Partner PE       | 0.06  | .27   | -0.05  | 0.17  |
|                          | Maternal Lagged Partner PE       | -0.01 | .83   | -0.11  | 0.09  |
|                          | Paternal Lagged Parenting Stress | -0.04 | .49   | -0.16  | 0.07  |
|                          | Maternal Lagged Parenting Stress | 0.04  | .31   | -0.04  | 0.12  |
|                          | <hr/>                            |       |       |        |       |
| Outcome                  |                                  |       |       |        |       |
| Positive Partner Support | Paternal Intercept               | 3.89  | <.001 | 3.27   | 4.51  |
|                          | Maternal Intercept               | 5.97  | <.001 | 5.45   | 6.49  |
|                          | Paternal Slope                   | 0.00  | .92   | -0.07  | 0.06  |
|                          | Maternal Slope                   | -0.03 | .22   | -0.07  | 0.02  |
|                          | Paternal Lagged PS               | 1.20  | <.001 | 1.12   | 1.28  |
|                          | Maternal Lagged PS               | 0.21  | <.001 | 0.15   | 0.28  |
|                          | <b>Paternal Lagged Actor PE</b>  | 0.48  | <.001 | 0.36   | 0.61  |
|                          | Maternal Lagged Actor PE         | 0.07  | .13   | -0.02  | 0.16  |
|                          | Paternal Lagged Partner PE       | 0.06  | .30   | -0.05  | 0.17  |
|                          | Maternal Lagged Partner PE       | -0.03 | .61   | -0.13  | 0.08  |
|                          | Paternal Lagged CSI              | 0.06  | .29   | -0.05  | 0.17  |
|                          | Maternal Lagged CSI              | 0.05  | .25   | -0.04  | 0.14  |

*Note.* RS = Relationship Satisfaction. CS = Childcare Satisfaction. PS = positive partner support.

**Ancillary Table 11**

*Dyadic Analyses Examining the Prospective Association between Positive Emotions and Support Provision while Controlling for Parenting Stress or Childcare Satisfaction in Study 2*

| Outcome           | Predictor                         | <i>B</i>  | <i>p</i> | 95% CI       |              |
|-------------------|-----------------------------------|-----------|----------|--------------|--------------|
|                   |                                   |           |          | <i>Lower</i> | <i>Upper</i> |
| Support Provision | Paternal Intercept                | 4.54      | <.001    | 3.92         | 5.16         |
|                   | Maternal Intercept                | 5.98      | <.001    | 5.68         | 6.27         |
|                   | Paternal Slope                    | 0.001     | 0.96     | -0.09        | 0.09         |
|                   | Maternal Slope                    | -0.01     | 0.41     | -0.05        | 0.02         |
|                   | Paternal Lagged Support Provision | 2.01      | <.001    | 1.91         | 2.10         |
|                   | Maternal Lagged Support Provision | 0.13      | <.001    | 0.08         | 0.17         |
|                   | <b>Paternal Lagged Actor PE</b>   | 0.40      | <.001    | 0.29         | 0.52         |
|                   | Maternal Lagged Actor PE          | 0.04      | 0.11     | -0.01        | 0.09         |
|                   | Paternal Lagged Partner PE        | -0.02     | 0.76     | -0.12        | 0.08         |
|                   | Maternal Lagged Partner PE        | 0.05      | 0.07     | -0.01        | 0.11         |
|                   | Paternal Lagged Parenting Stress  | -0.03     | 0.67     | -0.14        | 0.09         |
|                   | Maternal Lagged Parenting Stress  | 0.04      | 0.10     | -0.01        | 0.10         |
|                   | Outcome                           | Predictor | <i>B</i> | <i>p</i>     | <i>Lower</i> |
| Support Provision | Paternal Intercept                | 4.58      | <.001    | 3.99         | 5.17         |
|                   | Maternal Intercept                | 5.90      | <.001    | 5.54         | 6.26         |
|                   | Paternal Slope                    | -0.01     | 0.79     | -0.09        | 0.07         |
|                   | Maternal Slope                    | 0.001     | 0.85     | -0.04        | 0.03         |
|                   | Paternal Lagged Support Provision | 1.64      | <.001    | 1.54         | 1.74         |
|                   | Maternal Lagged Support Provision | 0.12      | .002     | 0.07         | 0.18         |
|                   | <b>Paternal Lagged Actor PE</b>   | 0.41      | <.001    | 0.29         | 0.52         |
|                   | Maternal Lagged Actor PE          | 0.05      | .13      | -0.02        | 0.11         |
|                   | Paternal Lagged Partner PE        | -0.01     | .83      | -0.11        | 0.09         |
|                   | Maternal Lagged Partner PE        | 0.06      | .11      | -0.02        | 0.13         |
|                   | Paternal Lagged CS                | 0.03      | .57      | -0.07        | 0.13         |
|                   | Maternal Lagged CS                | 0.03      | .37      | -0.04        | 0.10         |

Note. CS = Childcare Satisfaction. PE = positive emotions.

**Ancillary Table 12**

*Results of Multilevel Analyses Predicting Relationship Satisfaction using Full Information Maximum Likelihood Estimation in Study 2*

| <i>Predictor</i>                    | <i>B</i> | <i>p</i> | <u>95% CI</u> |              |
|-------------------------------------|----------|----------|---------------|--------------|
|                                     |          |          | <i>Lower</i>  | <i>Upper</i> |
| Paternal Intercept                  | 34.13    | <.001    | 28.91         | 39.35        |
| Maternal Intercept                  | 36.19    | <.001    | 31.92         | 40.47        |
| Paternal Slope                      | -0.26    | .14      | -0.61         | 0.09         |
| Maternal Slope                      | -0.03    | .83      | -0.26         | 0.21         |
| Paternal Lagged RS                  | 1.37     | <.001    | 1.29          | 1.46         |
| Maternal Lagged RS                  | 0.22     | <.001    | 0.16          | 0.27         |
| <b>Paternal Lagged Actor PE</b>     | 3.15     | <.001    | 2.46          | 3.84         |
| <b>Maternal Lagged Actor PE</b>     | 0.63     | .006     | 0.18          | 1.07         |
| Paternal Lagged Partner PE          | -0.50    | .11      | -1.12         | 0.11         |
| Maternal Lagged Partner PE          | 0.43     | .12      | -0.11         | 0.97         |
| Paternal Age                        | 0.04     | .63      | -0.12         | 0.19         |
| Maternal Age                        | -0.01    | .87      | -0.14         | 0.12         |
| Paternal Race (White vs. Non-White) | 2.05     | .02      | 0.39          | 3.72         |
| Maternal Race (White vs. Non-White) | -0.95    | .13      | -2.20         | 0.30         |
| Paternal Education Level            | -0.50    | .03      | -0.95         | -0.05        |
| Maternal Education Level            | 0.58     | .006     | 0.19          | 0.98         |
| Paternal Income                     | .001     | .99      | -0.47         | 0.48         |
| Maternal Income                     | 0.05     | .79      | -0.30         | 0.39         |

*Note.* PE = positive emotions. RS = relationship satisfaction. Parameters presented in bold indicated focal pathways that were statistically significant.

**Ancillary Table 13**

*Results of Multilevel Analyses Predicting Support Perceived Partner Support using Full Information Maximum Likelihood Estimation in Study 2*

| <i>Predictor</i>                    | <i>B</i>    | <i>p</i>        | <u>95% CI</u> |              |
|-------------------------------------|-------------|-----------------|---------------|--------------|
|                                     |             |                 | <i>Lower</i>  | <i>Upper</i> |
| Paternal Intercept                  | 3.92        | <.001           | 3.12          | 4.71         |
| Maternal Intercept                  | 5.28        | <.001           | 4.50          | 6.05         |
| Paternal Slope                      | -0.02       | 0.49            | -0.09         | 0.04         |
| Maternal Slope                      | -0.01       | 0.79            | -0.07         | 0.05         |
| Paternal Lagged PS                  | 0.80        | <.001           | 0.69          | 0.90         |
| Maternal Lagged PS                  | 0.38        | <.001           | 0.27          | 0.49         |
| <b>Paternal Lagged Actor PE</b>     | <b>0.59</b> | <b>&lt;.001</b> | <b>0.47</b>   | <b>0.71</b>  |
| <b>Maternal Lagged Actor PE</b>     | <b>0.12</b> | <b>.02</b>      | <b>0.02</b>   | <b>0.22</b>  |
| Paternal Lagged Partner PE          | 0.02        | .69             | -0.08         | 0.13         |
| Maternal Lagged Partner PE          | -0.05       | .41             | -0.17         | 0.07         |
| Paternal Age                        | 0.01        | .41             | -0.01         | 0.03         |
| Maternal Age                        | 0.01        | .41             | -0.01         | 0.03         |
| Paternal Race (White vs. Non-White) | 0.34        | .003            | 0.11          | 0.57         |
| Maternal Race (White vs. Non-White) | -0.37       | <.001           | -0.57         | -0.18        |
| Paternal Education Level            | -0.07       | .03             | -0.13         | -0.01        |
| Maternal Education Level            | 0.05        | .08             | -0.01         | 0.11         |
| Paternal Income                     | -0.05       | .12             | -0.10         | 0.01         |
| Maternal Income                     | 0.04        | .15             | -0.01         | 0.08         |

*Note.* PE = positive emotions. PS = positive support. Parameters presented in bold indicated focal pathways that were statistically significant.

**Ancillary Table 14**

*Results of Multilevel Analyses Predicting Support Provision using Full Information Maximum Likelihood Estimation in Study 2*

| <i>Predictor</i>                    | <i>B</i>    | <i>p</i>        | <u>95% CI</u> |              |
|-------------------------------------|-------------|-----------------|---------------|--------------|
|                                     |             |                 | <i>Lower</i>  | <i>Upper</i> |
| Paternal Intercept                  | 4.33        | <.001           | 3.53          | 5.14         |
| Maternal Intercept                  | 5.93        | <.001           | 5.25          | 6.61         |
| Paternal Slope                      | -0.03       | .23             | -0.08         | 0.02         |
| Maternal Slope                      | 0.002       | .87             | -0.03         | 0.04         |
| Paternal Lagged Support Provision   | 0.59        | <.001           | 0.49          | 0.69         |
| Maternal Lagged Support Provision   | 0.10        | .005            | 0.03          | 0.17         |
| <b>Paternal Lagged Actor PE</b>     | <b>0.49</b> | <b>&lt;.001</b> | <b>0.38</b>   | <b>0.60</b>  |
| <b>Maternal Lagged Actor PE</b>     | <b>0.14</b> | <b>&lt;.001</b> | <b>0.07</b>   | <b>0.21</b>  |
| Paternal Lagged Partner PE          | -0.01       | .83             | -0.11         | 0.09         |
| <b>Maternal Lagged Partner PE</b>   | <b>0.09</b> | <b>.04</b>      | <b>0.00</b>   | <b>0.18</b>  |
| Paternal Age                        | 0.01        | .61             | -0.02         | 0.03         |
| Maternal Age                        | -0.01       | .50             | -0.03         | 0.02         |
| Paternal Race (White vs. Non-White) | 0.51        | <.001           | 0.24          | 0.77         |
| Maternal Race (White vs. Non-White) | -0.32       | .003            | -0.53         | -0.11        |
| Paternal Education Level            | -0.05       | .21             | -0.12         | 0.03         |
| Maternal Education Level            | -0.09       | .01             | -0.16         | -0.02        |
| Paternal Income                     | 0.02        | .56             | -0.05         | 0.09         |
| Maternal Income                     | 0.06        | .03             | 0.01          | 0.11         |

*Note.* PE = positive emotions. Parameters presented in bold indicated focal pathways that were statistically significant.

**Ancillary Table 15**

*Results of multilevel distinguishable dyadic analyses predicting observed social support variables at 6-months postpartum while controlling for prenatal negative affect.*

| <i>Outcome</i>                            | <i>Predictor</i>                 | <i>B</i> | <i>p</i> | <u>95% CI</u> |              | <i>r</i> |
|-------------------------------------------|----------------------------------|----------|----------|---------------|--------------|----------|
|                                           |                                  |          |          | <i>Lower</i>  | <i>Upper</i> |          |
| Observed Emotional Support at 6-Months    | Intercept                        | 2.37     | .001     | 1.00          | 3.74         | -        |
|                                           | Prenatal Actor Support Provision | 0.20     | .02      | 0.03          | 0.36         | .14      |
|                                           | Prenatal Actor PE                | 0.19     | .055     | -0.004        | 0.39         | .11      |
|                                           | Prenatal Partner PE              | -0.01    | .93      | -0.24         | 0.22         | .00      |
|                                           | Prenatal Actor Negative Affect   | 0.03     | .82      | -0.24         | 0.31         | .01      |
|                                           | Gender                           | -0.16    | .67      | -0.91         | 0.58         | .03      |
|                                           | Prenatal Actor PE x Gender       | -0.06    | .59      | -0.26         | 0.15         | .03      |
|                                           | Prenatal Partner PE x Gender     | 0.09     | .38      | -0.11         | 0.29         | .05      |
| Observed Instrumental Support at 6-Months | Intercept                        | 2.42     | <.001    | 1.11          | 3.73         | -        |
|                                           | Prenatal Actor Support Provision | 0.20     | .02      | 0.04          | 0.36         | .14      |
|                                           | Prenatal Actor PE                | 0.14     | .16      | -0.06         | 0.35         | .08      |
|                                           | Prenatal Partner PE              | 0.01     | .94      | -0.22         | 0.24         | .00      |
|                                           | Prenatal Actor Negative Affect   | 0.04     | .77      | -0.24         | 0.32         | .02      |
|                                           | Gender                           | -0.30    | .47      | -1.09         | 0.50         | .06      |
|                                           | Prenatal Actor PE x Gender       | 0.06     | .54      | -0.14         | 0.26         | .04      |
|                                           | Prenatal Partner PE x Gender     | 0.00     | .98      | -0.20         | 0.19         | .00      |
| Observed Negative Support at 6-Months     | Intercept                        | 5.23     | <.001    | 4.24          | 6.21         | -        |
|                                           | Prenatal Actor Support Provision | -0.13    | .03      | -0.24         | -0.01        | .13      |
|                                           | <b>Prenatal Actor PE</b>         | -0.16    | .02      | -0.30         | -0.02        | .13      |
|                                           | Prenatal Partner PE              | -0.01    | .90      | -0.17         | 0.15         | .01      |
|                                           | Prenatal Actor Negative Affect   | -0.01    | .93      | -0.20         | 0.18         | .01      |
|                                           | Gender                           | 0.15     | .57      | -0.36         | 0.65         | .05      |
|                                           | Prenatal Actor PE x Gender       | -0.01    | .93      | -0.15         | 0.14         | .01      |
|                                           | Prenatal Partner PE x Gender     | -0.02    | .74      | -0.17         | 0.12         | .02      |

*Note.* Statistically significant focal predictors are highlighted in bold.



**Ancillary Table 16**

*Results of Preregistered Cross-Lagged Structural Path Model Predicting Relationship Satisfaction*

| Outcome                            | Predictor                          | <i>B</i> | <i>SE</i> | <i>p</i> |
|------------------------------------|------------------------------------|----------|-----------|----------|
| 6-Month Positive Emotions          | Prenatal Positive Emotion          | 0.29     | 0.07      | <.001    |
|                                    | Prenatal Relationship Satisfaction | 0.02     | 0.01      | .007     |
| 6-Month Relationship Satisfaction  | Prenatal Positive Emotion          | 0.28     | 0.46      | .54      |
|                                    | Prenatal Relationship Satisfaction | 0.65     | 0.09      | <.001    |
| 12-Month Positive Emotions         | 6-Month Positive Emotions          | 0.32     | 0.07      | <.001    |
|                                    | 6-Month Relationship Satisfaction  | 0.02     | 0.01      | .008     |
|                                    | Prenatal Positive Emotion          | 0.25     | 0.08      | .001     |
|                                    | Prenatal Relationship Satisfaction | -0.01    | 0.01      | .61      |
| 12-Month Relationship Satisfaction | 6-Month Positive Emotions          | 0.39     | 0.66      | .55      |
|                                    | 6-Month Relationship Satisfaction  | 0.63     | 0.11      | <.001    |
|                                    | Prenatal Positive Emotion          | 0.27     | 0.58      | .64      |
|                                    | Prenatal Relationship Satisfaction | 0.18     | 0.09      | .05      |
| 18-Month Positive Emotions         | 12-Month Positive Emotions         | 0.49     | 0.08      | <.001    |
|                                    | 12-Month Relationship Satisfaction | 0.00     | 0.01      | .80      |
|                                    | 6-Month Positive Emotions          | 0.39     | 0.08      | <.001    |
|                                    | 6-Month Relationship Satisfaction  | 0.00     | 0.01      | .88      |
| 18-Month Relationship Satisfaction | 12-Month Positive Emotions         | 1.49     | 0.44      | .001     |
|                                    | 12-Month Relationship Satisfaction | 0.50     | 0.11      | <.001    |
|                                    | 6-Month Positive Emotions          | -0.43    | 0.44      | .32      |
|                                    | 6-Month Relationship Satisfaction  | 0.35     | 0.09      | <.001    |
| 24-Month Positive Emotion          | 18-Month Positive Emotions         | 0.13     | 0.10      | .20      |
|                                    | 18-Month Relationship Satisfaction | 0.01     | 0.01      | .17      |
|                                    | 12-Month Positive Emotions         | 0.05     | 0.09      | .55      |
|                                    | 12-Month Relationship Satisfaction | 0.00     | 0.01      | .82      |
| 24-Month Relationship Satisfaction | 18-Month Positive Emotions         | 0.42     | 0.45      | .34      |
|                                    | 18-Month Relationship Satisfaction | 0.62     | 0.11      | <.001    |
|                                    | 12-Month Positive Emotions         | -1.25    | 0.76      | .10      |
|                                    | 12-Month Relationship Satisfaction | 0.33     | 0.13      | .01      |

*Note.* Results are collapsed across mothers and fathers.  $\chi^2(12) = 42.66, p < .001, RMSEA = .08, 95\% CI [.06, .11], CFI = .95.$

**Ancillary Table 17**

*Results of Preregistered Cross-Lagged Structural Path Model Predicting Positive Partner Support*

| Outcome                      | Predictor                    | <i>B</i> | <i>SE</i> | <i>p</i> |
|------------------------------|------------------------------|----------|-----------|----------|
| 6-Month Positive Emotions    | Prenatal Positive Emotion    | 0.30     | 0.07      | <.001    |
|                              | Prenatal Support Perceptions | 0.16     | 0.05      | .001     |
| 6-Month Support Perceptions  | Prenatal Positive Emotion    | 0.14     | 0.10      | .19      |
|                              | Prenatal Support Perceptions | 0.54     | 0.10      | <.001    |
| 12-Month Positive Emotions   | 6-Month Positive Emotions    | 0.33     | 0.06      | <.001    |
|                              | 6-Month Support Perceptions  | 0.09     | 0.05      | .08      |
|                              | Prenatal Positive Emotion    | 0.24     | 0.08      | .002     |
|                              | Prenatal Support Perceptions | 0.03     | 0.06      | .64      |
| 12-Month Support Perceptions | 6-Month Positive Emotions    | -0.06    | 0.08      | .43      |
|                              | 6-Month Support Perceptions  | 0.56     | 0.06      | <.001    |
|                              | Prenatal Positive Emotion    | 0.20     | 0.09      | .02      |
|                              | Prenatal Support Perceptions | 0.25     | 0.08      | .001     |
| 18-Month Positive Emotions   | 12-Month Positive Emotions   | 0.46     | 0.08      | <.001    |
|                              | 12-Month Support Perceptions | 0.04     | 0.04      | .38      |
|                              | 6-Month Positive Emotions    | 0.38     | 0.07      | <.001    |
|                              | 6-Month Support Perceptions  | 0.01     | 0.04      | .78      |
| 18-Month Support Perceptions | 12-Month Positive Emotions   | 0.05     | 0.09      | .58      |
|                              | 12-Month Support Perceptions | 0.45     | 0.08      | <.001    |
|                              | 6-Month Positive Emotions    | 0.14     | 0.08      | .07      |
|                              | 6-Month Support Perceptions  | 0.29     | 0.11      | .01      |
| 24-Month Positive Emotion    | 18-Month Positive Emotions   | 0.16     | 0.11      | .15      |
|                              | 18-Month Support Perceptions | 0.02     | 0.06      | .74      |
|                              | 12-Month Positive Emotions   | 0.05     | 0.10      | .59      |
|                              | 12-Month Support Perceptions | 0.03     | 0.06      | .56      |
| 24-Month Support Perceptions | 18-Month Positive Emotions   | 0.27     | 0.10      | .007     |
|                              | 18-Month Support Perceptions | 0.48     | 0.08      | <.001    |
|                              | 12-Month Positive Emotions   | -0.16    | 0.10      | .10      |
|                              | 12-Month Support Perceptions | 0.29     | 0.08      | <.001    |

*Note.* Results are collapsed across mothers and fathers.  $\chi^2(12) = 32.39, p < .001, RMSEA = .06, 95\% CI [.04, .09], CFI = .97.$

**Ancillary Table 18***Results of Preregistered Cross-Lagged Structural Path Model Predicting Support Provision*

| Outcome                    | Predictor                  | <i>B</i> | <i>SE</i> | <i>p</i> |
|----------------------------|----------------------------|----------|-----------|----------|
| 6-Month Positive Emotions  | Prenatal Positive Emotion  | 0.34     | 0.07      | <.001    |
|                            | Prenatal Support Provision | 0.04     | 0.06      | .51      |
| 6-Month Support Provision  | Prenatal Positive Emotion  | -0.03    | 0.07      | .69      |
|                            | Prenatal Support Provision | 0.64     | 0.06      | <.001    |
| 12-Month Positive Emotions | 6-Month Positive Emotions  | 0.38     | 0.06      | <.001    |
|                            | 6-Month Support Provision  | -0.06    | 0.05      | .23      |
|                            | Prenatal Positive Emotion  | 0.25     | 0.08      | .002     |
|                            | Prenatal Support Provision | 0.04     | 0.06      | .51      |
| 12-Month Support Provision | 6-Month Positive Emotions  | 0.11     | 0.08      | .19      |
|                            | 6-Month Support Provision  | 0.49     | 0.10      | <.001    |
|                            | Prenatal Positive Emotion  | 0.03     | 0.08      | .70      |
|                            | Prenatal Support Provision | 0.34     | 0.08      | <.001    |
| 18-Month Positive Emotions | 12-Month Positive Emotions | 0.50     | 0.08      | <.001    |
|                            | 12-Month Support Provision | -0.02    | 0.05      | .62      |
|                            | 6-Month Positive Emotions  | 0.39     | 0.07      | <.001    |
|                            | 6-Month Support Provision  | 0.04     | 0.06      | .54      |
| 18-Month Support Provision | 12-Month Positive Emotions | 0.11     | 0.05      | .04      |
|                            | 12-Month Support Provision | 0.61     | 0.05      | <.001    |
|                            | 6-Month Positive Emotions  | 0.01     | 0.05      | .91      |
|                            | 6-Month Support Provision  | 0.16     | 0.06      | .009     |
| 24-Month Positive Emotion  | 18-Month Positive Emotions | 0.46     | 0.07      | <.001    |
|                            | 18-Month Support Provision | 0.10     | 0.08      | .21      |
|                            | 12-Month Positive Emotions | 0.14     | 0.07      | .046     |
|                            | 12-Month Support Provision | -0.07    | 0.07      | .31      |
| 24-Month Support Provision | 18-Month Positive Emotions | 0.12     | 0.10      | .22      |
|                            | 18-Month Support Provision | 0.37     | 0.13      | .004     |
|                            | 12-Month Positive Emotions | -0.01    | 0.07      | .91      |
|                            | 12-Month Support Provision | 0.36     | 0.10      | <.001    |

*Note.* Results are collapsed across mothers and fathers.  $\chi^2(12) = 44.69, p < .001, RMSEA = .06, 95\% CI [.06, .11], CFI = .95.$
